# Supplementary material for: Interplay of structural fluctuations and charge carrier dynamics is key for high performance of hybrid lead halide perovskites
Source: Royal Society of Chemistry journal article supplement (doi:10.1039/d2qi01482c), 2022-01-01
Supplement: d2qi01482c1.pdf [file d2qi01482c1.pdf]

## *Supporting Information*

# Interplay of Structural Fluctuations and Charge Carrier Dynamics is Key for High Performance of Hybrid Lead Halide Perovskites

Juan Zhan,<sup>1</sup> Jack Yang,<sup>2</sup> Xiaoyin Xie,<sup>3\*</sup> Oleg V. Prezhdo,<sup>4\*</sup> and Wei Li<sup>1\*</sup>

<sup>1</sup>*School of Chemistry and Materials Science, Hunan Agricultural University, Changsha 410128, China*

<sup>2</sup>*School of Material Science and Engineering, Materials and Manufacturing Futures Institute, University of New South Wales, Sydney, New South Wales 2052, Australia*

<sup>3</sup>*School of Chemistry and Chemical Engineering, Hubei Polytechnic University, Huangshi, 435003, China*

<sup>4</sup>*Department of Chemistry, University of Southern California, Los Angeles, California 90089, United States*

E-mails:

[weili@hunau.edu.cn](mailto:weili@hunau.edu.cn) (W.L.)

[prezhdo@usc.edu](mailto:prezhdo@usc.edu) (O.V.P.)

[xyxie@hbpu.edu.cn](mailto:xyxie@hbpu.edu.cn) (X.Y.X.)

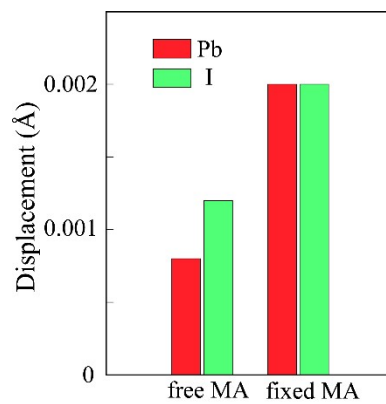

**Figure S1.** The simulated root-mean-square displacements of Pb and I atoms in the MAPbI<sub>3</sub> perovskite with free and fixed MA cations.
